# Supplementary material for: Expression of the NRF2 Target Gene NQO1 Is Enhanced in Mononuclear Cells in Human Chronic Kidney Disease
Source: Hindawi journal article supplement (doi:10.1155/2017/9091879), 2017-01-01
Supplement: f1 [file 9091879.f1.pdf]

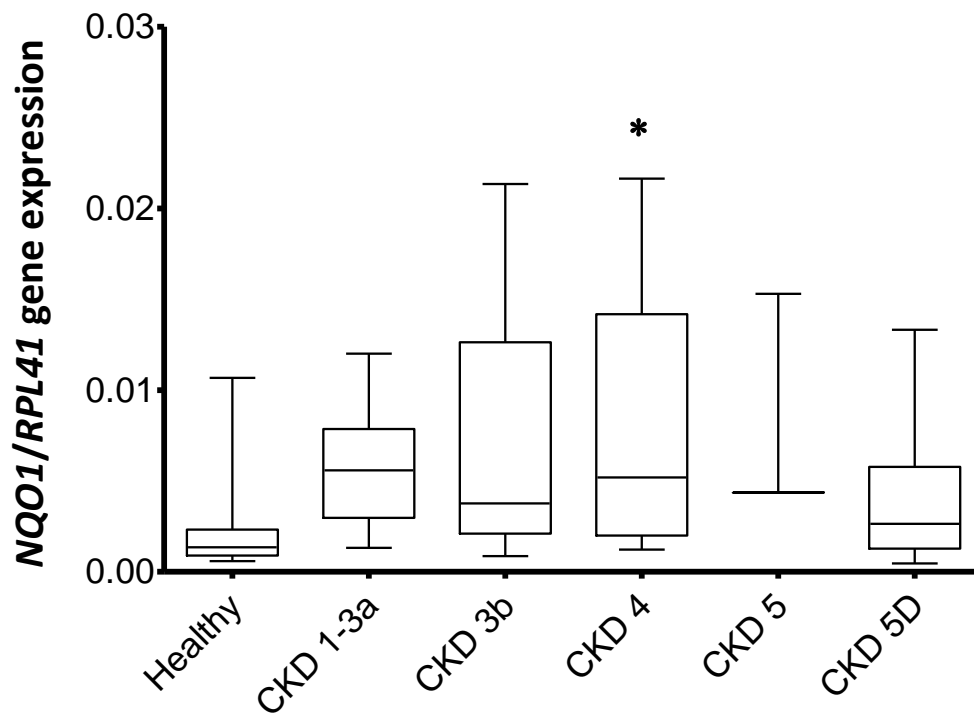

Supplementary figure 1 Shen et al.

### Figure legend

#### Supplementary figure 1 *NQO1* gene expression and stage of CKD.

Box-and-whisker plots (whiskers, minimum to maximum) showing summary data of the *NQO1* gene expression relative to *RPL41* in healthy subjects (n=16), CKD 1-3a (n=6), CKD 3b (n=8), CKD 4 (n=12), CKD 5 (n=3) and CKD 5 patients with dialysis treatment (CKD 5D; n=34). \* p<0.05 by Dunn's post test.
